# Supplementary material for: Neuroprotective Studies on Polygonum hydropiper L. Essential Oils Using Transgenic Animal Models
Source: Frontiers journal article supplement (doi:10.3389/fphar.2020.580069), 2021-01-27
Supplement: Table_1.DOCX [file Table_1.DOCX]

**Table S1:** Detail of compounds identified in GC-MS analysis of Ph.Lo.

| S. No. | Compound Chemical / Label Name | Common Name | RT | Formula | Hits (DB) |
| --- | --- | --- | --- | --- | --- |
| 1 | (1E)-1-(Pentyloxy)-1-butene | NF | 6.059 | C9H18O | 10 |
| 2 | Cyclohexene, 1-methyl-4-(1-methylethenyl) | Limonene | 6.351 | C10H16 | 10 |
| 3 | 5-Oxopentanoic acid | Keto pentanoate | 6.903 | C5H8O3 | 10 |
| 4 | N-Formyl-2-hydroxy-3-methyl-2-(1-methylethyl) butanamide | NF | 7.519 | C9H17NO3 | 10 |
| 5 | 4,4-dimethyl-1-heptene | NF | 7.851 | C9H18 | 10 |
| 6 | 6-Methyl-2,4-heptanedione | Isovaleryl acetone | 8.222 | C8H14O2 | 10 |
| 7 | (5E)-3,6-Dimethyl-5-octen-2-one | NF | 8.272 | C10H18O | 10 |
| 8 | 6-Methyl-5-octen-2-one | NF | 8.819 | C9H16O | 10 |
| 9 | 1,3,3-trimethyl-2-norbornanol | Fenchol | 8.973 | C10H18O | 10 |
| 10 | trans-2,7-Dimethyl-4,6-octadien-2-ol | NF | 9.061 | C10H18O | 10 |
| 11 | 3-Chloro-2-methyl-2-pentanol | NF | 9.183 | C6H13ClO | 10 |
| 12 | Octanoic acid | Caprylic acid | 9.344 | C8H16O2 | 10 |
| 13 | 6-Methyl-1-heptanol | Isooctanol | 9.917 | C8H18O | 10 |
| 14 | Ethoxymethoxy cyclohexane | NF | 10.45 | C9H18O2 | 10 |
| 15 | 2-Ethyl-1-butanol, trifluoroacetate | NF | 10.516 | C8H13F3O2 | 10 |
| 16 | 1-(2,2-Dimethylcyclopentyl)ethanone | NF | 10.924 | C9H16O | 10 |
| 17 | cis-13-Octadecenal | NF | 11.116 | C18H34O | 10 |
| 18 | Octane, 1-cyclopropyl | Octylcyclopropane | 11.572 | C11H22 | 10 |
| 19 | (2S,4aS.8aR)-(-)-5,5,8a-Trimethyldecahydronaphthalene-2-yl acetate | NF | 11.947 | C15H26O2 | 10 |
| 20 | Bornyl acetate / Borneol acetate | Endobornyl Acetate | 11.993 | C12H20O2 | 10 |
| 21 | 6-Methyl-5-octen-2-one | NF | 12.131 | C9H16O | 10 |
| 22 | Octanal, 7-hydroxy-3,7-dimethyl | Hydroxycitronellal/ Fixol | 12.631 | C10H20O2 | 10 |
| 23 | 5,9-Tetradecadiyne | NF | 12.999 | C14H22 | 10 |
| 24 | 2-Isopropenyl-5-methyl-6-hepten-1-ol | NF | 13.455 | C11H20O | 10 |
| 25 | Limonene Dioxide -2 | Limonene Dioxide-2 | 13.767 | C10H16O2 | 10 |
| 26 | 2-Pentanone, 3-[(acetyloxy)methyl]-3,4-dimethyl-, (.+-.)- | NF | 13.953 | C10H18O3 | 10 |
| 27 | Bicyclo[2.2.1]heptane-2-carboxaldehyde, 3-methyl-, (2-endo,3-exo)- | Limonene Dioxide-1 | 14.091 | C9H14O | 10 |
| 28 | Limonene Dioxide 1 | NF | 14.201 | C10H16O2 | 10 |
| 29 | CIS-1,3-Diisopropenyl-Trans-4-Vinyl-4-Methylcyclohexane | beta.-Elemene | 14.359 | C15H24 | 10 |
| 30 | 2-Butanone, 4-(2,2-dimethyl-6-methylenecyclohexyl) | NF | 14.446 | C13H22O | 10 |
| 31 | 4-Methylhept-6-En-3-One | NF | 14.535 | C8H14O | 10 |
| 32 | Gamma Caryophyllene | isocaryophyllene | 14.708 | C15H24 | 10 |
| 33 | 2-Butanone, 4-(2,6,6-trimethyl-2-cyclohexen-1-yl) | Dihydro .alpha. ionone | 14.822 | C13H22O | 10 |
| 34 | Igamma Caryophyllene | isocaryophyllene | 14.988 | C15H24 | 10 |
| 35 | p-Menth-8-en-1-ol, stereoisomer | cis-.beta.-Terpineol | 15.092 | C10H18O | 10 |
| 36 | 7,8-Dihydro beta ionone | Dihydro beta ionone | 15.277 | C13H22O | 10 |
| 37 | 5,9-Undecadien-2-one, 6,10-dimethyl | cis-Geranylacetone | 15.504 | C13H22O | 10 |
| 38 | 4-Isopropenyl-1-methyl-7-oxabicyclo[4.1.0]heptan-2-one | cis-Carvone oxide | 15.648 | C10H14O2 | 10 |
| 39 | 1,3,6-Octatriene, 3,7-Dimethyl-, (E)- | Beta-Ocimene | 15.697 | C10H16 | 10 |
| 40 | (E)-3,4-Epoxy-1-(1',2'-epoxy-3',3'-epoxymethano-2',6',6'-trimethyl-1'-cycloh... | NF | 15.751 | C15H22O3 | 10 |
| 41 | Cyclopentane, 2-ethylidene-1,1-dimethyl | NF | 15.843 | C9H16 | 10 |
| 42 | Trans-Sabinene Hydrate | 4-Thujanol | 15.901 | C10H18O | 10 |
| 43 | (-)-Globulol | Globulol | 16.105 | C15H26O | 10 |
| 44 | 2-Heptene, 2-methyl-6-p-tolyl | NF | 16.185 | C15H22 | 10 |
| 45 | 1,6,10-Dodecatrien-3-ol, 3,7,11-trimethyl | Nerolidol/ E-farnesol | 16.27 | C15H26O | 10 |
| 46 | Guaia-1(10),11-diene | Alpha Bulnesene | 16.382 | C15H24 | 10 |
| 47 | 2(3H)-Benzofuranone, hexahydro-4,4,7a-trimethyl | Tetrahydroactinidiolide | 16.542 | C11H18O2 | 10 |
| 48 | 1.Xi.,6.xi.,7.xi.-Cadina-4,9-diene | Alpha Muurolene | 16.591 | C15H24 | 10 |
| 49 | Alpha-Bisabolene | Bisabolene | 16.707 | C15H24 | 10 |
| 50 | 4-Isopropenyl-1-methyl-7-oxabicyclo[4.1.0]heptane | cis Limonene oxide | 16.768 | C10H16O | 10 |
| 51 | (+)-Sativen | Sativene | 16.84 | C15H24 | 10 |
| 52 | 4-Isopropenyl-1-methylcyclohexanol | Terpineol | 16.958 | C10H18O | 10 |
| 54 | Farnesyl Acetone C | NF | 17.017 | C18H30O | 3 |
| 55 | 2(1H)-Naphthalenone, octahydro-4a,7,7-trimethyl-, ciss | NF | 17.205 | C13H22O | 10 |
| 56 | Allyl(chloromethyl) dimethylsilane | NF | 17.363 | C6H13ClSi | 4 |
| 57 | 3-Allyl-2,6,6-trimethylbicyclo[3.1.1]heptane | NF | 17.413 | C13H22 | 10 |
| 58 | 1,13-Tetradecadiene | NF | 17.594 | C14H26 | 10 |
| 59 | Bicyclo[4.1.0]heptane,-3-cyclopropyl,-7-hydroxymethyl, trans | NF | 17.72 | C11H18O | 10 |
| 60 | cis-5-Methyl-2,3,3a,4,7,7a-hexahydroinden-1-one | NF | 17.757 | C10H14O | 8 |
| 61 | 1,6,10-Dodecatrien-3-ol, 3,7,11-trimethyl-, [S-(Z)]- $$ (+)-Nerolidol | NF | 17.838 | C15H26O | 10 |
| 62 | 2H-cyclopropa[g]benzofuran, 4,5,5a,6,6a,6b-hexahydro-4,4,6b-Trimethyl | Benzofuran | 17.926 | C15H22O | 7 |
| 63 | Cyclopropanemethanol, 2-methyl-2-(4-methyl-3-pentenyl) | NF | 18.07 | C11H20O | 10 |
| 64 | Cyclohexanol, 2-Methylene-5-(1-Methylethenyl)-, (1s-Trans) | NF | 18.205 | C10H16O | 10 |
| 65 | Bicyclo[2.2.2]oct-2-ene, 1,2,3,6-tetramethyl | NF | 18.448 | C12H20 | 10 |
| 66 | (1R,5S,8R,9R)-4,4,8-trimethyltricyclo[6.3.1.0(1,5)]dodeca-2-en-9-ol | NF | 18.481 | C15H24O | 10 |
| 67 | Limonene Dioxide 2 | Limonene Dioxide 2 | 18.539 | C10H16O2 | 10 |
| 68 | 3-(1-Methylhept-1-enyl)-5-methyl-2,5-dihydrofuran-2-one | NF | 18.594 | C13H20O2 | 10 |
| 69 | (-)-.beta.-Caryophyllene epoxide | Caryophyllene oxide | 18.662 | C15H24O | 10 |
| 70 | 1,1,4,7-Tetramethyldecahydro-1H-cyclopropa[e]azulen-4-ol | Epiglobulol | 18.747 | C15H26O | 10 |
| 71 | 1-Dodecyn-3-ol | NF | 18.931 | C12H22O | 1 |
| 72 | Naphthalene, decahydro | Decahydronaphthalene | 18.951 | C10H18 | 10 |
| 73 | 7,8-Epoxy-.alpha.-ionone | NF | 19.056 | C13H20O2 | 10 |
| 74 | 3-Heptadecen-5-yne, (Z)- | NF | 19.162 | C17H30 | 10 |
| 75 | Geranyl acetate [trans-3,7-dimethyl-2,6-octadien-1-ylacetate] | NF | 19.271 | C12H20O2 | 3 |
| 76 | cis-3-Hexenyl phenyl acetate | Benzeneacetic acid | 19.316 | C14H18O2 | 10 |
| 77 | (-)-Caryophyllene oxide | Caryophyllene epoxide | 19.393 | C15H24O | 10 |
| 78 | 7,8,8a,9-Tetrahydro-8a-methylnaphtho[2,3-b]furan-4,5(4aH,6H)-dione | NF | 19.427 | C13H14O3 | 10 |
| 79 | Veridiflorol | Veridiflorol | 19.519 | C15H26O | 10 |
| 80 | cyclohexane, 1,5-diethenyl-2,3-dimethyl-, (1.alpha.,2.beta.,3.beta.,5.beta.)- | NF | 19.784 | C12H20 | 10 |
| 81 | 1-(3,3-dimethyl-bicyclo[2.2.1.]hept-2-yl)-2-penten-1-one | NF | 19.973 | C14H22O | 1 |
| 82 | 2,6,10,14-Tetramethyl-2R,3R-epoxy-6E,10E,14E-hexadecatrien-1,16-diol | NF | 20.095 | C20H34O3 | 10 |
| 83 | 8(12)-Drimen-7.alpha.,11-diol | NF | 20.126 | C15H26O2 | 10 |
| 84 | 6-exo-Methoxy-3-methyl-3a,6a-dihydrofuro[3,4-d]isoxazol-4(6H)-one | NF | 20.215 | C7H9NO4 | 1 |
| 85 | 11-Hexadecyn-1-ol | NF | 20.338 | C16H30O | 10 |
| 86 | 2,6-Dimethyl-4-oxo-11-oxatricyclo[5.4.2.1(7,10).0(5,10)]undec-8-ene | NF | 20.381 | C12H16O2 | 5 |
| 87 | 1,3,6,10-Dodecatetraene, 3,7,11-trimethyl- | Farnesene | 20.669 | C15H24 | 10 |
| 88 | Bergamotol, Z-.alpha.-trans- | Bergamotol | 20.826 | C15H24O | 10 |
| 89 | Pyrimidine, 4-cyclopropyl- | Cyclopropyl pyrimidine | 20.909 | C7H8N2 | 6 |
| 90: | 7-Oxabicyclo[4.1.0]heptane, 1-methyl-4-(2-methyloxiranyl)- | Dipentene dioxide | 21.338 | C10H16O2 | 10 |
| 91: | 5-Methylenedec-9-en-2-one | NF | 21.645 | C11H18O | 10 |
| 92: | Bi-1-cycloocten-1-yl | NF | 21.883 | C16H26 | 10 |
| 93: | Limonene Dioxide 2 | Limonene Dioxide 2 | 21.966 | C10H16O2 | 10 |
| 94: | Limonene Dioxide 4 | Limonene Dioxide 4 | 22.123 | C10H16O2 | 10 |
| 95: | Benzene, 4-fluoro-1,2-dimethyl- | 4-fluoro-1,2-xylene | 22.383 | C8H9F | 10 |
| 96: | 1-Pentyn-3-one, 4-methyl- | 2-Methyl-3-Oxo-4-Pentyne | 22.419 | C6H8O | 1 |
| 97 | Methyl 10,12-heptadecadiynoate | NF | 22.507 | C18H28O2 | 10 |
| 98 | 2,6,10,14,18,22-Tetracosahexaene, 2,6,10,15,19,23-hexamethyl-, (all-E)- | NF | 22.567 | C30H50 | 2 |
| 99 | 5-Hexyl-3,3-dimethyl-1-cyclopentene | NF | 22.754 | C13H24 | 10 |
| 100 | (7E)-4,8,12-Trimethyltrideca-2,3,7,11,-tetraene-1-ol | NF | 22.917 | C16H26O | 3 |
| 101 | (-)-Campherenone | Campherenone | 23.016 | C15H24O | 5 |
| 102 | 5,8-methano-3,4,4a,5,6,7,8,8a-octahydro-1H-2-benzopyran-1-one | NF | 23.104 | C10H14O2 | 1 |
| 103 | 1-(hydroxymethyl)-2-vinylcyclopentane | NF | 23.21 | C8H14O | 10 |
| 104 | 3,4-Dimethylhexanedial | NF | 23.431 | C8H10O2 | 10 |
| 105 | 4-Isopropenyl-4,7-dimethyl-1-oxaspiro[2.5]octane | NF | 24.037 | C12H20O | 10 |
| 106 | 6-Methyl-2-heptanone | NF | 24.358 | C8H16O | 10 |
| 107 | Bicyclo[4.3.0]nonane, 7-methylene-2,4,4-trimethyl-2-vinyl- | NF | 24.449 | C15H24 | 10 |
| 108 | myrcene | Mycrene | 24.592 | C10H16 | 1 |
| 109 | 5-Isopropyl-3-phenyl-2-thiohydantoin | NF | 24.776 | C12H14N2OS | 1 |
| 110 | 4-[Acetylmethyl]-3,3-dimethyl-3,4-dihydrobenzopyran-2H-2-one | NF | 24.91 | C14H16O3 | 1 |
| 111 | 15-Chloro-4-pentadecyne | NF | 25.483 | C15H27Cl | 10 |
| 112 | longipinanol | longipinanol | 25.663 | C15H26O | 3 |
| 113 | 1-Methyl-6-(3-methylbuta-1,3-dienyl)-7-oxabicyclo[4.1.0]heptane | NF | 25.831 | C12H18O | 10 |
| 114 | 3-Buten-2-ol, 3-methyl-4-(2,6,6-trimethyl-2-cyclohexen-1-yl)- | NF | 26.258 | C14H24O | 10 |
| 115 | 7,7-dichlorobicyclo[3.2.0]hept-2-en-6-one | NF | 26.634 | C15H24O | 10 |
| 116 | 2-Isopropyl-tricyclo[4.3.1.1(2,5)]undec-3-en-10-ol | NF | 26.819 | C14H22O | 10 |
| 117 | But-3-enal, 2-methyl-4-(2,6,6-trimethyl-1-cyclohexenyl)- | NF | 27.177 | C14H22O | 10 |
| 118 | 6,6,10-Trimethylundeca-3,8,10-triene-2,7-dione | NF | 27.3 | C14H20O2 | 3 |
| 119 | 5-Iminopyrrolidine-2-carbonitrile | NF | 27.746 | C5H7N3 | 7 |
| 120 | 7,7-dichlorobicyclo[3.2.0]hept-2-en-6-one | NF | 27.908 | C15H24O | 10 |
| 121 | 1,3,5-Cycloheptatriene, 3,4-diethyl-7,7-dimethyl- | NF | 28.274 | C13H20 | 10 |
| 122 | juniper camphor | Juniper camphor | 28.487 | C15H26O | 10 |
| 123 | Longifolenaldehyde | longifolenaldehyde | 28.782 | C15H24O | 10 |
| 124 | (E)-3-(3'-methyl-1',3'-butadienyl)-2,4,4-trimethylcyclohexanone | NF | 29.125 | C14H22O | 10 |
| 125 | N-2-Methylpropanoyl-3,4-dihydro-1H-2,1-benzoxazine | NF | 29.524 | C12H15NO2 | 2 |
| 126 | Benzo[e]isobenzofuran-1,4-dione,1,3,4,5,5a,6,7,8,9,9a- decahydro-6,6,9a-trime | NF | 29.9 | C15H20O3 | 10 |
| 127 | (+-)cis-1,2-Dihydroxy-1,2,3,4-tetrahydrochrysene | NF | 29.922 | C18H16O2 | 5 |
| 128 | 3h-Cyclodeca[B]Furan-2-One, 4,9-Dihydroxy-6-Methyl-3,10-Dimethylene-3a | NF | 30.391 | C15H20O4 | 10 |
| 129 | Cyclopentanecarboxaldehyde, 2-methyl-3-methylene- | NF | 30.596 | C8H12O | 10 |
| 130 | Cycloisolongifolene | Cycloisolongifolene | 31.629 | C15H24 | 10 |
| 131 | aromadendrene 2 | aromadendrene | 31.933 | C15H24 | 10 |
| 132: | Cyclopentanone, 2-(2-octenyl)- | NF | 32.24 | C13H22O | 10 |
| 133 | iso-velleral | Isovelleral | 32.564 | C15H20O2 | 10 |
| 134 | iso-velleral | Isovelleral | 32.907 | C15H20O2 | 10 |
| 135 | allyl ionone 1 | Allyl Ionone | 33.71 | C16H24O | 10 |
| 136 | Cyclohexane, (1-Bromo-3,3-dimethyl-2-hydroxybutylidene)- | NF | 34.152 | C12H21BrO | 6 |
| 137 | Androstan-17-one, 3-ethyl-3-hydroxy-, (5.alpha.)- | Androstan | 34.34 | C21H34O2 | 10 |
| 138 | Ethyl 5,8,11,14,17-eicosapentaenoate | NF | 35.817 | C22H34O2 | 10 |
| 139 | 2-(4a,8-Dimethyl-1,2,3,4,4a,5,6,7-octahydro-naphthalen-2-yl)-prop-2-en-1-ol | NF | 36.021 | C15H24O | 10 |
| 140 | 1,2-Benzenedicarboxylic acid, bis(2-ethylhexyl) ester | DEHP/ DNOP | 39.649 | C24H38O4 | 10 |
| 141 | Cholest-5-ene, 3-bromo-, (3.beta.) | NF | 48.262 | C27H45Br | 10 |

NF: Not found
